# Supplementary material for: Divergent climate feedbacks in the growing period and the dormancy period to sowing date shift of winter wheat in the North China Plain
Source: Copernicus journal article supplement (doi:10.5194/bg-2020-388), 2020-11-20
Supplement: Supplementary file [file bg-2020-388-AC4-supplement.pdf]

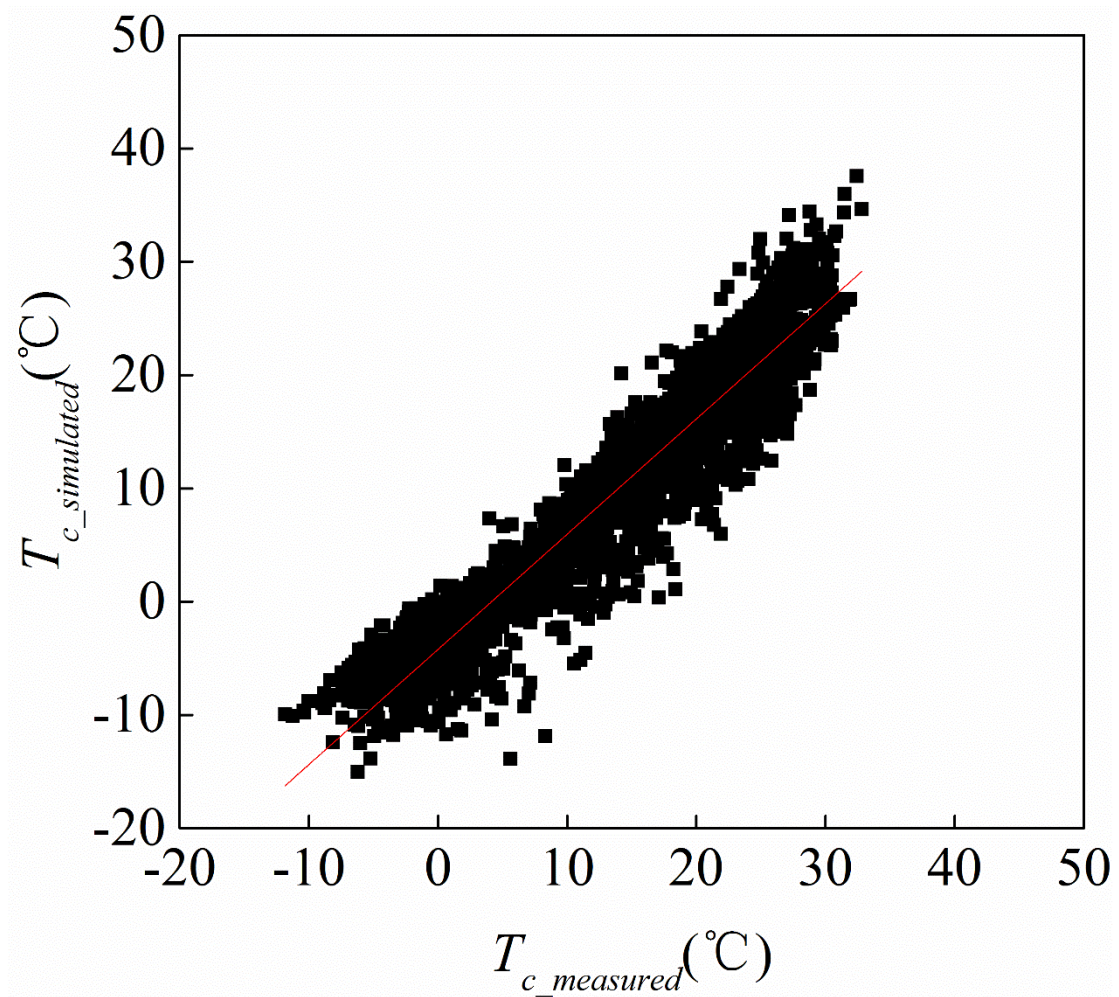

**Fig.1** The relationship between simulated canopy temperature ( $T_{c\_simulated}$ ) and measured canopy temperature ( $T_{c\_measured}$ ) at Yucheng station over 2003-2010

Linear regression equation:  $T_{c\_simulated} = 1.02 * T_{c\_measured} - 4.22$ ,  $R^2 = 0.91$ ,  $p < 0.001$

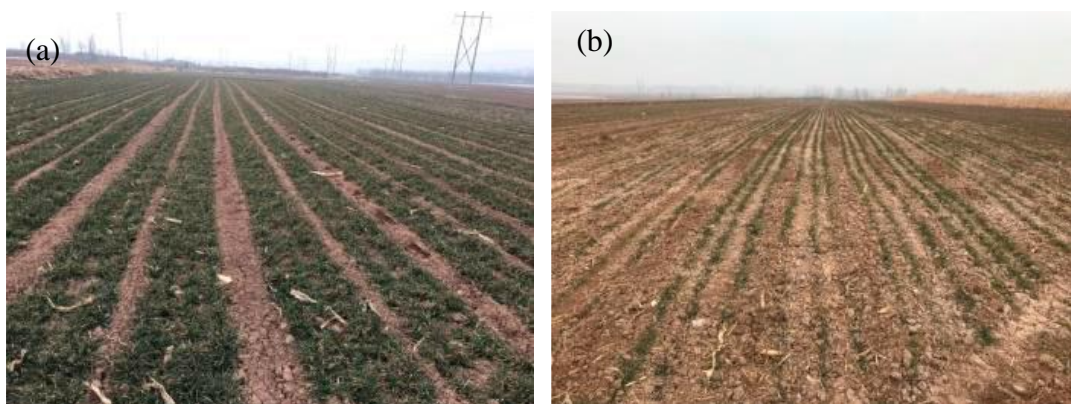

**Fig.2** Land surface characteristics of winter wheat in re-greening period for (a) early and (b) late sowing date. Photos taken by Liu Fengshan in Fengjiafangzi Village,

Jinzhongzi Town, Anqiu City, Shandong Province, on February 25, 2018.

**Table 1** The coverage differences between two scenarios of snow and crop in the 4 phases at selected 10 stations

| Stations  | Snow coverage |         |         |         | Crop coverage |         |         |         |
|-----------|---------------|---------|---------|---------|---------------|---------|---------|---------|
|           | Phase 1       | Phase 2 | Phase 3 | Phase 4 | Phase 1       | Phase 2 | Phase 3 | Phase 4 |
| Miyun     | 0             | 0       | 0       | 0       | 0.927         | 0.009   | 0       | 0       |
| Baodi     | 0             | 0       | 0.01    | 0       | 0.919         | 0.011   | 0       | 0       |
| Tangshan  | 0             | 0       | 0       | 0       | 0.917         | 0.013   | 0       | 0       |
| Huanghua  | 0             | 0       | 0       | 0       | 0.827         | 0.002   | 0       | -0.001  |
| Weifang   | 0             | 0       | 0       | 0       | 0.82          | 0       | 0       | 0       |
| Xinxiang  | 0             | 0       | 0.01    | 0       | 0.768         | 0       | 0       | 0.001   |
| Zhengzhou | 0             | 0       | 0       | 0       | 0.764         | 0       | 0       | 0.002   |
| Shangqiu  | 0             | 0       | 0.01    | 0.01    | 0.753         | 0       | 0       | 0.001   |
| Nanyang   | 0             | 0       | 0.01    | 0       | 0.719         | 0       | 0       | 0.003   |
| Zhumadian | 0             | 0       | 0.01    | 0       | 0.741         | 0       | 0       | 0.003   |
